# Supplementary material for: Long-Term Outcome with New Generation Prostheses in Patients Undergoing Transcatheter Aortic Valve Replacement
Source: MDPI journal article supplement (doi:10.3390/jcm10143102), 2021-07-14
Supplement: s1 [file s1]

**Table S1.** Echocardiographic Parameters.

|                                                                            |          | All Patients (N = 359) | SAPIEN 3 (N = 215)     | Evolut (N = 144)      | p-Value          |
|----------------------------------------------------------------------------|----------|------------------------|------------------------|-----------------------|------------------|
| Aortic Valve Area (cm <sup>2</sup> )                                       | baseline | <b>0.74</b> ± 0.2      | <b>0.76</b> ± 0.2      | <b>0.71</b> ± 0.2     | <b>0.017</b>     |
|                                                                            | 30 days  | <b>1.57</b> ± 0.4      | <b>1.49</b> ± 0.4      | <b>1.71</b> ± 0.4     | <b>&lt;0.001</b> |
|                                                                            | 1 year   | <b>1.53</b> ± 0.5      | <b>1.44</b> ± 0.5      | <b>1.70</b> ± 0.5     | <b>0.002</b>     |
| Peak Gradient (mmHg)                                                       | baseline | 68.4 ± 25.7            | 67.5 ± 25.5            | 69.9 ± 26             | 0.404            |
|                                                                            | 30 days  | 18.2 ± 8.0             | 21.6 ± 7.6             | 12.8 ± 5.1            | <b>&lt;0.001</b> |
|                                                                            | 1 year   | 18.2 ± 8.0             | 21.6 ± 9.0             | 13.5 ± 4.9            | <b>&lt;0.001</b> |
| Mean Gradient (mmHg)                                                       | baseline | 40.4 ± 16.8            | 39.9 ± 16.4            | 41.2 ± 17.2           | 0.487            |
|                                                                            | 30 days  | 9.4 ± 4.1              | 11.2 ± 4.0             | 6.6 ± 2.5             | <b>&lt;0.001</b> |
|                                                                            | 1 year   | 9.4 ± 4.1              | 11.6 ± 5.4             | 6.8 ± 2.4             | <b>&lt;0.001</b> |
| Aortic Regurgitation / PVR ≥ 2 - n (%)                                     | baseline | 56 ( <b>15.6</b> )     | 33 ( <b>15.4</b> )     | 23 ( <b>16.0</b> )    | 0.888            |
|                                                                            | 30 days  | 7/346 ( <b>2.0</b> )   | 2/207 ( <b>1.0</b> )   | 5/139 ( <b>3.6</b> )  | 0.088            |
|                                                                            | 1 year   | 5/147 ( <b>3.4</b> )   | 3/94 ( <b>3.2</b> )    | 2/53 ( <b>3.8</b> )   | 0.969            |
| LVEF (%)                                                                   | baseline | 51.5 ± 13.5            | 49.6 ± 14.4            | 54.5 ± 11.3           | <b>&lt;0.001</b> |
|                                                                            | 30 days  | 55.9 ± 11.2            | 54.7 ± 11.7            | 57.7 ± 9.9            | <b>0.045</b>     |
|                                                                            | 1 year   | 55.9 ± 11.2            | 57.1 ± 11.3            | 55.9 ± 10.0           | 0.523            |
| Systolic PAP (mmHg)                                                        | baseline | 37.7 ± 14.8            | 36.1 ± 14.2            | 40.2 ± 15.2           | <b>0.011</b>     |
|                                                                            | 30 days  | 33.8 ± 10.8            | 32.8 ± 10.0            | 35.5 ± 11.9           | 0.074            |
|                                                                            | 1 year   | 33.8 ± 10.8            | 34.7 ± 13.2            | 35.8 ± 11.7           | 0.651            |
| Mitral Regurgitation ≥ 2 - n (%)                                           | baseline | 123 ( <b>34.3</b> )    | 72 ( <b>33.5</b> )     | 51 ( <b>35.4</b> )    | 0.706            |
|                                                                            | 30 days  | 48/187 ( <b>20.4</b> ) | 29/116 ( <b>20.0</b> ) | 19/71 ( <b>21.1</b> ) | 0.837            |
|                                                                            | 1 year   | 36/111 ( <b>24.5</b> ) | 22/72 ( <b>23.4</b> )  | 14/39 ( <b>26.4</b> ) | 0.684            |
| Tricuspid Regurgitation ≥ 2 - n (%)                                        | baseline | 92 ( <b>25.8</b> )     | 47 ( <b>22.0</b> )     | 45 ( <b>31.5</b> )    | <b>0.044</b>     |
|                                                                            | 30 days  | 48/186 ( <b>20.5</b> ) | 28/116 ( <b>19.4</b> ) | 20/70 ( <b>22.2</b> ) | 0.609            |
|                                                                            | 1 year   | 36/111 ( <b>24.5</b> ) | 19/75 ( <b>20.2</b> )  | 17/36 ( <b>32.1</b> ) | 0.108            |
| LVEF - Left Ventricular Ejection Fraction, PAP - Pulmonary Artery Pressure |          |                        |                        |                       |                  |

**Table S2.** Predictors of All-Cause Mortality.

|                                                                                | Univariate                 |                  | Multivariate                |                  |
|--------------------------------------------------------------------------------|----------------------------|------------------|-----------------------------|------------------|
|                                                                                | Hazard Ratio (CI)          | <i>p</i> -Value  | Hazard Ratio (CI)           | <i>p</i> -Value  |
| Prosthesis (Sapien 3 vs. Evolut R)                                             | 1.034 (0.746–1.433)        | 0.843            | 0.937 (0.646–1.359)         | 0.732            |
| Age                                                                            | 1.023 (0.998–1.049)        | 0.073            | 1.026 (0.995–1.058)         | 0.095            |
| Sex (Male)                                                                     | 0.900 (0.661–1.226)        | 0.505            | 0.857 (0.598–1.227)         | 0.400            |
| Coronary Artery Disease                                                        | 1.125 (0.816–1.549)        | 0.472            | 1.048 (0.729–1.506)         | 0.799            |
| Prior Coronary Bypass                                                          | 0.831 (0.509–1.356)        | 0.459            | 0.664 (0.386–1.141)         | 0.138            |
| Left Ventricular Ejection Fraction ≤ 50%                                       | <b>1.649 (1.211–2.244)</b> | <b>0.001</b>     | <b>1.649 (1.166–2.330)</b>  | <b>0.005</b>     |
| Diabetes                                                                       | 1.114 (0.802–1.547)        | 0.521            | 1.165 (0.807–1.681)         | 0.416            |
| Peripheral Artery Disease                                                      | <b>1.814 (1.146–2.871)</b> | <b>0.011</b>     | <b>2.298 (1.382–3.820)</b>  | <b>0.001</b>     |
| Chronic Kidney Injury (GFR ≤ 60ml/min)                                         | <b>1.494 (1.048–2.131)</b> | <b>0.027</b>     | <b>1.516 (1.015–2.265)</b>  | <b>0.042</b>     |
| COPD ≥ Grade II (GOLD)                                                         | 1.273 (0.796–2.035)        | 0.313            | <b>1.704 (1.016–2.856)</b>  | <b>0.043</b>     |
| History of Cancer                                                              | <b>2.025 (1.379–2.973)</b> | <b>&lt;0.001</b> | <b>2.448 (1.638–3.660)</b>  | <b>&lt;0.001</b> |
| Stroke In-Hospital                                                             | 1.572 (0.581–4.253)        | 0.373            | <b>4.216 (1.486–11.960)</b> | <b>0.007</b>     |
| Major Vascular Complication                                                    | 1.700 (0.867–3.332)        | 0.122            | 1.398 (0.544–3.593)         | 0.487            |
| Life-Threatening or Disabling Bleeding                                         | 2.175 (0.805–5.876)        | 0.126            | 1.547 (0.381–6.272)         | 0.542            |
| Permanent Pacemaker Implantation                                               | 1.131 (0.814–1.571)        | 0.463            | 1.167 (0.822–1.658)         | 0.387            |
| Paravalvular Regurgitation ≥ 2                                                 | 1.453 (0.538–3.922)        | 0.461            | 1.462 (0.475–4.495)         | 0.508            |
| GFR = Glomerular filtration rate, COPD = Chronic Obstructive Pulmonary Disease |                            |                  |                             |                  |
